# Supplementary material
Source: MDPI journal article supplement (https://www.mdpi.com/2076-3417/12/17/8531)
Supplement: s1 [file s1]

**Figure S1.** Effects of different concentrations of Ascorbic acid on cell viability(n=6).

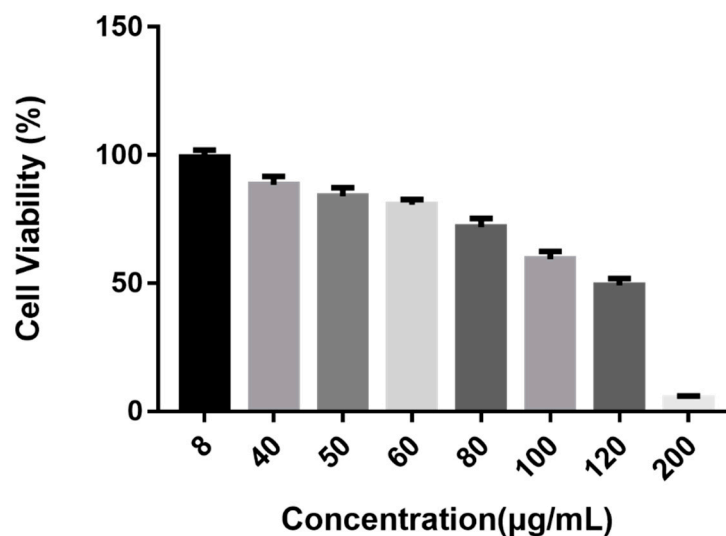

According to Figure S1, ascorbic acid at a high concentration showed toxic to HSF cells. When the concentration of Ascorbic acid was 60μg/ mL, the cell viability was above 80%. Ascorbic acid at 60μg/ mL was chosen as the positive control in this study.

**Figure S2.** The protective effects of Ascorbic acid on UVA-induced(A) and H<sub>2</sub>O<sub>2</sub>-induced(B) oxidative stress damage in HSF cells.

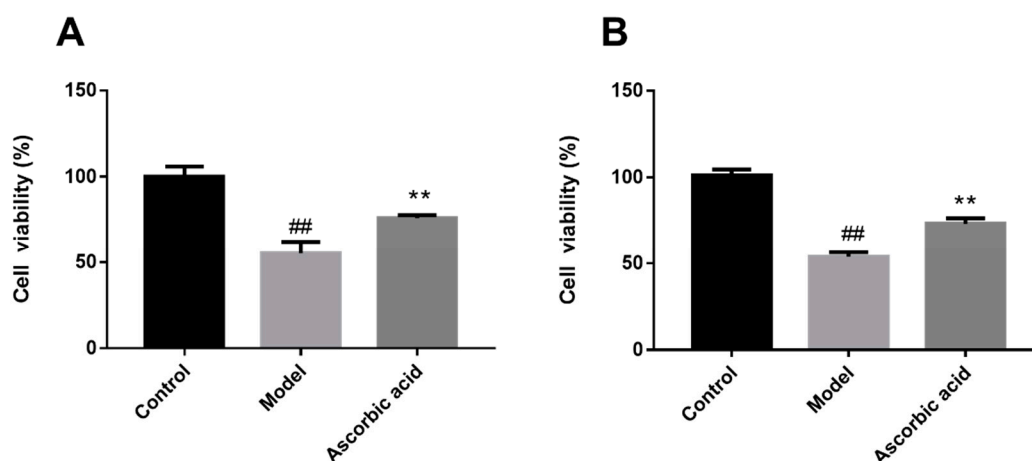

The Model in Figure S2A was established by UVA (22 J/cm<sup>2</sup>); and the Model in Figure S2B was established by H<sub>2</sub>O<sub>2</sub>(1000 μmol·L<sup>-1</sup>). The discussed concentration of Ascorbic acid is 60

μg/mL.

**Notes:** Statistical significance was determined by ANOVA test. ##,  $p < 0.01$ , compared with the DMEM-treated control. \*\*  $p < 0.01$ , compared with the Model.

**Abbreviations:** H<sub>2</sub>O<sub>2</sub>, hydrogen peroxide.

Ascorbic acid can protect cells from oxidative damage by UVA/H<sub>2</sub>O<sub>2</sub> and improve cell viability. Ascorbic acid at 60μg/mL has a significant protective effect on cell damage.

**Table S1.** Reagents and dosage

| Reagents                     | Dosage(μL) |
|------------------------------|------------|
| Template                     | 1.5        |
| Forward Primer (10 μM)       | 0.4        |
| Reverse Primer (10 μM)       | 0.4        |
| 2×TransStart® Top Green qPCR | 10.0       |
| Passive Reference Dye (50×)  | 0.4        |
| Nuclease-free Water          | 7.3        |
